# Supplementary material
Source: Springer Nature journal article supplement (https://www.springermedizin.de/resource/supplementary/12889_2011_4680_MOESM4_ESM.pdf/9493744)

(a) Farmers

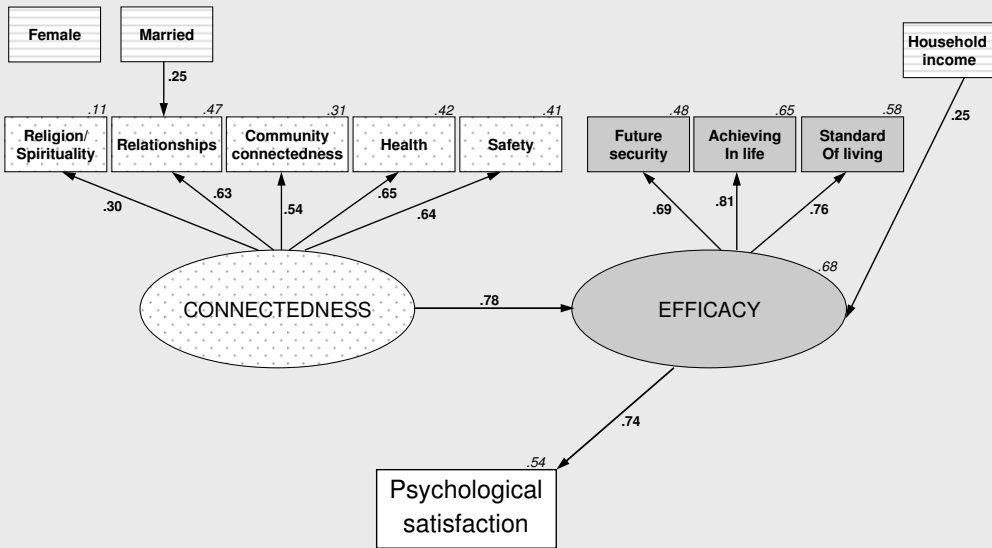

(b) General Community

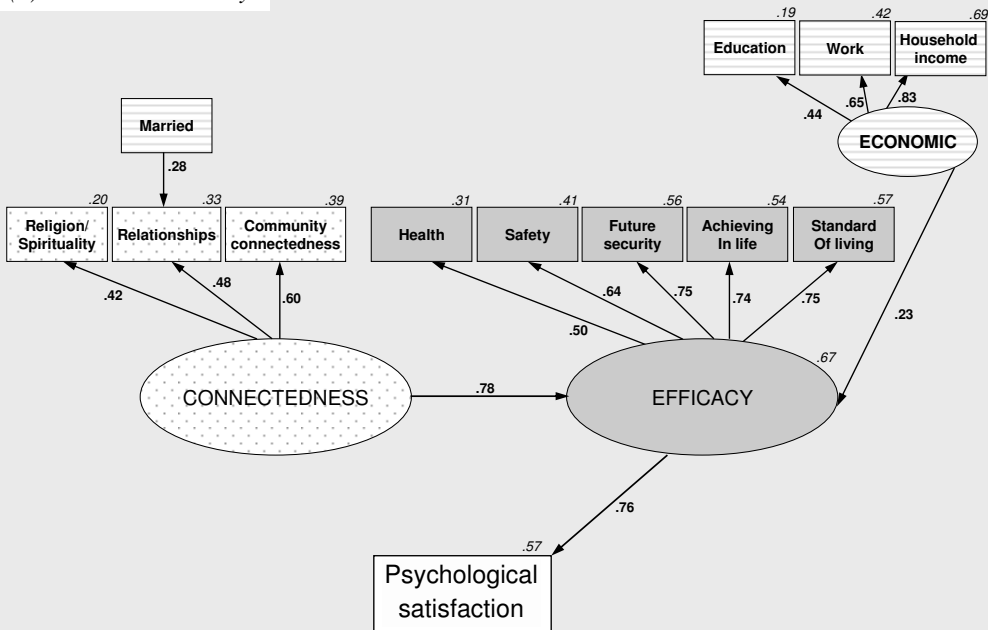

Supplement: MOESM4 [file 9493744]
